# Supplementary material for: Effects of Transcranial Direct Current Stimulation on Baseline and Slope of Prefrontal Cortex Hemodynamics During a Spatial Working Memory Task
Source: Front Hum Neurosci. 2020 Apr 9;14:64. doi: 10.3389/fnhum.2020.00064 (PMC7179692; doi:10.3389/fnhum.2020.00064)
Supplement: Supplementary file 1 [file Table_1.XLSX]

## Sheet: Sheet1
Supplementary Table 1
Effects of Stimulation and Stimulation Block on HbO, HbR and Oxygenation
	Opt. 1: Left Pars Opercularis - B.A. 44
	HbO			HbR			Oxy
	df	B	SE	df	B	SE	df	B	SE
Fixed
Stim: Block 2 Intercept	20.73	-0.271499	0.274016	20.71	0.56	0.411584	20	-0.837108	0.52894
Sham: Block 1 Intercept Diff.	20.11	0.34	0.375749	20.33	-1.07303	0.566142	19.64	1.41	0.727535
Stim: Block 1 Intercept Diff.	9485	*** 0.24	0.0538699	9834	*** -0.66	0.0621022	9845	*** 0.91	0.0801897
Sham: Block 2 Intercept Diff.	20.88	-0.00935483	0.379277	20.8	-0.242351	0.569288	20.08	0.23	0.731618
Sham: Block 3 Intercept Diff.	22.5	-0.0179192	0.386473	21.78	0.04	0.575741	21.02	-0.0626029	0.739994
Stim: Block 3 Intercept Diff.	9555	*** -0.36	0.0562313	9852	*** 0.26	0.0648129	9862	*** -0.62	0.0836891
Stim: Block 2 Slope	9903	-0.0111776	0.00895204	9903	0.01	0.0102915	9903	-0.0238969	0.013287
Sham: Block 1 Slope Diff.	9917	0.02	0.0130851	9911	-0.0191681	0.0150458	9911	0.03	0.0194251
Stim: Block 1 Slope Diff.	9907	0.02	0.012282	9905	-0.0151393	0.0141204	9905	0.03	0.0182304
Sham: Block 2 Slope Diff.	9904	** 0.04	0.0130953	9903	-0.0221848	0.0150549	9903	** 0.06	0.0194369
Sham: Block 3 Slope Diff.	9910	-0.00914185	0.0139957	9907	-0.00899186	0.0160912	9907	-0.00	0.0207749
Stim: Block 3 Slope Diff.	9908	0.00	0.0127985	9905	-0.0270104	0.0147143	9905	0.03	0.0189971
		Var	SD		Var	SD		Var	SD
Random
Intercept		0.714609	0.84535		1.64564	1.28282		2.7171	1.6484
Trial		0.0003852	0.01963		0.0009492	0.03081		0.001657	0.0407
Residual		0.51979	0.72096		0.686953	0.82883		1.14505	1.0701
N	21
Observations	9954
	Opt. 2: Left Pars Triangularis - B.A. 45
	HbO			HbR			Oxy
	df	B	SE	df	B	SE	df	B	SE
Fixed
Stim: Block 2 Intercept	20.54	-0.156014	0.355659	20.04	0.65	0.326539	20	-0.813048	0.54167
Sham: Block 1 Intercept Diff.	19.99	0.14	0.488071	19.64	-0.822278	0.448907	19.62	0.97	0.744904
Stim: Block 1 Intercept Diff.	10280	*** 0.25	0.0655128	10460	*** -1.04	0.0516101	10430	*** 1.30	0.0828421
Sham: Block 2 Intercept Diff.	20.66	0.17	0.492107	20.12	-0.489505	0.451656	20.08	0.65	0.749162
Sham: Block 3 Intercept Diff.	22.07	0.34	0.500317	21.14	-0.383527	0.457266	21.03	0.71	0.757858
Stim: Block 3 Intercept Diff.	10310	*** -0.46	0.0675496	10460	*** 0.38	0.0532056	10440	*** -0.85	0.085408
Stim: Block 2 Slope	10280	-0.00	0.0108306	10440	-0.00	0.0085095	10440	0.00	0.0136707
Sham: Block 1 Slope Diff.	10450	-0.0295592	0.015646	10450	0.01	0.0122943	10450	(*) -0.04	0.0197509
Stim: Block 1 Slope Diff.	10440	-0.00	0.0148761	10440	-0.00	0.0116884	10440	-0.00	0.0187775
Sham: Block 2 Slope Diff.	10440	** 0.05	0.0156981	10440	* -0.03	0.0123339	10440	*** 0.08	0.0198146
Sham: Block 3 Slope Diff.	10450	(*) -0.03	0.0170555	10440	0.01	0.0134014	10440	-0.0411375	0.0215291
Stim: Block 3 Slope Diff.	10450	-0.0112164	0.0152832	10440	0	0.0120083	10440	-0.00743514	0.0192913
		Var	SD		Var	SD		Var	SD
Random
Intercept		1.21106	1.10048		1.0327	1.0162		2.84767	1.6875
Trial		0.0008625	0.02937		0.001624	0.0403		0.00254	0.0504
Residual		0.794592	0.8914		0.490496	0.7004		1.26592	1.1251
N	21
Observations	10493
	Opt. 3: Left Dorsolateral PFC - B.A. 46
	HbO			HbR			Oxy
	df	B	SE	df	B	SE	df	B	SE
Fixed
Stim: Block 2 Intercept	20.15	-0.564723	0.340209	19.74	0.00	0.243702	19.88	-0.575649	0.45312
Sham: Block 1 Intercept Diff.	19.75	0.46	0.467682	19.46	-0.264371	0.335507	19.55	0.73	0.623489
Stim: Block 1 Intercept Diff.	9464	*** 0.56	0.0545833	9875	*** -0.19	0.0328635	9771	*** 0.76	0.0654596
Sham: Block 2 Intercept Diff.	20.31	0.63	0.470993	19.85	-0.421462	0.337201	20.01	1.06	0.627089
Sham: Block 3 Intercept Diff.	21.47	(*) 1.05	0.477578	2066	-0.567418	0.340583	20.94	* 1.63	0.634266
Stim: Block 3 Intercept Diff.	9531	** -0.15	0.0567108	9883	*** 0.35	0.0341364	9796	*** -0.50	0.0680011
Stim: Block 2 Slope	9886	-0.0115173	0.0091347	9886	-0.00798985	0.00547967	9885	-0.00	0.0109301
Sham: Block 1 Slope Diff.	9897	-0.0084192	0.013172	9892	** 0.03	0.00790253	9894	* -0.03	0.0157622
Stim: Block 1 Slope Diff.	9889	0.01	0.0124906	9887	0.01	0.0074931	9888	0.01	0.014946
Sham: Block 2 Slope Diff.	9887	*** 0.05	0.0137873	9886	*** -0.03	0.00827073	9886	*** 0.09	0.0164973
Sham: Block 3 Slope Diff.	9893	-0.0134582	0.0149942	9889	* 0.02	0.00899571	9890	-0.0333476	0.0179426
Stim: Block 3 Slope Diff.	9889	0.01	0.0128901	9887	* 0.02	0.00773281	9888	-0.0087636	0.0154241
		Var	SD		Var	SD		Var	SD
Random
Intercept		1.1198	1.05821		0.580184	0.7617		1.99887	1.41381
Trial		0.0003933	0.01983		0.0003674	0.01917		0.0009102	0.03017
Residual		0.549067	0.74099		0.197578	0.4445		0.786104	0.88663
N	21
Observations	9937
	Opt. 4: Left Ventrolateral PFC - B.A. 46
	HbO			HbR			Oxy
	df	B	SE	df	B	SE	df	B	SE
Fixed
Stim: Block 2 Intercept	18.09	-0.47927	0.332935	17.89	0.13	0.159749	18.37	-0.602958	0.349913
Sham: Block 1 Intercept Diff.	17.68	0.39	0.480978	17.44	-0.385125	0.230639	17.87	0.77	0.504909
Stim: Block 1 Intercept Diff.	8210	*** 0.64	0.0584236	8772	*** -0.26	0.0296181	8173	*** 0.90	0.067354
Sham: Block 2 Intercept Diff.	18.36	0.04	0.485593	18.21	0.49	0.233147	18.71	-0.444361	0.510733
Sham: Block 3 Intercept Diff.	19.86	-0.138234	0.495181	19.89	* 0.55	0.23835	20.55	-0.685535	0.522799
Stim: Block 3 Intercept Diff.	8273	(*) -0.13	0.0596714	8778	*** 0.13	0.0302445	8238	*** -0.26	0.0687946
Stim: Block 2 Slope	8784	0.00	0.00954443	8778	(*) -0.01	0.00481807	8789	0.01	0.0110106
Sham: Block 1 Slope Diff.	8801	** -0.04	0.0152519	8800	0.01	0.00769995	8805	** -0.05	0.0175934
Stim: Block 1 Slope Diff.	8788	-0.0074057	0.0133529	8790	0.01	0.00674087	8793	-0.020578	0.0154038
Sham: Block 2 Slope Diff.	8785	*** 0.10	0.0156885	8788	0.00	0.00791967	8790	*** 0.10	0.0180984
Sham: Block 3 Slope Diff.	8795	** -0.05	0.0175295	8792	0.02	0.00885029	8798	** -0.07	0.0202216
Stim: Block 3 Slope Diff.	8788	-0.0155363	0.0134921	8790	0.01	0.00681115	8793	-0.0272229	0.0155645
		Var	SD		Var	SD		Var	SD
Random
Intercept		1.0666	1.03276		0.244361	0.49433		1.16881	1.08112
Trial		0.000387	0.01967		0.0002663	0.01632		0.0004687	0.02165
Residual		0.628733	0.79293		0.160218	0.40027		0.836745	0.91474
N	19
Observations	8836
	Opt. 5: Left Dorsomedial PFC - B.A. 10
	HbO			HbR			Oxy
	df	B	SE	df	B	SE	df	B	SE
Fixed
Stim: Block 2 Intercept	27.04	-0.457211	0.304715	19.98	0.01	0.212665	20.04	-0.470895	0.419492
Sham: Block 1 Intercept Diff.	26.17	0.68	0.418144	19.61	-0.0903431	0.292481	19.65	0.77	0.576793
Stim: Block 1 Intercept Diff.	9457	*** 0.90	0.0571395	9728	* -0.08	0.0327071	9565	*** 0.98	0.066288
Sham: Block 2 Intercept Diff.	27.44	0.52	0.42232	20.15	-0.560512	0.294457	20.21	1.08	0.580884
Sham: Block 3 Intercept Diff.	30.07	0.84	0.430566	21.24	** -0.91	0.298382	21.37	** 1.75	0.588998
Stim: Block 3 Intercept Diff.	9515	*** -0.25	0.0591029	9737	*** 0.41	0.0338241	9605	*** -0.65	0.0685624
Stim: Block 2 Slope	9738	-0.0168302	0.00949496	9740	-0.00597222	0.0054202	9740	-0.0108766	0.0110066
Sham: Block 1 Slope Diff.	9751	-0.00	0.0138333	9748	** 0.03	0.00789791	9749	-0.030394	0.0160373
Stim: Block 1 Slope Diff.	9741	0.02	0.0130132	9741	0.00	0.00742887	9742	0.02	0.0150852
Sham: Block 2 Slope Diff.	9739	** 0.04	0.0144936	9740	*** -0.05	0.00827377	9740	*** 0.09	0.0168012
Sham: Block 3 Slope Diff.	9745	0.01	0.0158106	9743	** 0.03	0.00902637	9746	-0.0195656	0.0183283
Stim: Block 3 Slope Diff.	9742	0.02	0.0134431	9742	0.01	0.00767435	9742	0.01	0.0155837
		Var	SD		Var	SD		Var	SD
Random
Intercept		0.887193	0.94191		0.438667	0.66232		1.70405	1.3054
Trial		0.000508	0.02254		0.0003546	0.01883		0.0008067	0.0284
Residual		0.596676	0.77245		0.194434	0.44095		0.801771	0.8954
N	21
Observations	9791
	Opt. 6: Left Ventromedial PFC - B.A. 10
	HbO			HbR			Oxy
	df	B	SE	df	B	SE	df	B	SE
Fixed
Stim: Block 2 Intercept	20.35	-0.514453	0.398824	20.05	0.12	0.186349	40.19	-0.626146	0.34472
Sham: Block 1 Intercept Diff.	19.88	0.35	0.547816	19.53	-0.167883	0.255785	38.34	0.52	0.472657
Stim: Block 1 Intercept Diff.	9512	*** 0.98	0.0695415	9942	*** -0.18	0.034251	9319	*** 1.15	0.0686173
Sham: Block 2 Intercept Diff.	20.52	0.38	0.552201	20.23	0.05	0.258083	40.85	0.33	0.477584
Sham: Block 3 Intercept Diff.	21.85	0.50	0.560937	21.69	0.07	0.262654	46.15	0.42	0.487365
Stim: Block 3 Intercept Diff.	9577	-0.0419159	0.072455	9968	*** 0.21	0.0356818	9400	*** -0.25	0.0714942
Stim: Block 2 Slope	10140	-0.00	0.0115711	10140	-0.00632764	0.00568487	10130	0.01	0.011427
Sham: Block 1 Slope Diff.	10150	** -0.05	0.0169688	10150	0.01	0.00833693	10150	*** -0.06	0.0167558
Stim: Block 1 Slope Diff.	10140	-0.00	0.0158892	10140	0.01	0.00780656	10140	-0.00980831	0.0156911
Sham: Block 2 Slope Diff.	10140	*** 0.07	0.0173313	10140	** -0.02	0.00851489	10130	*** 0.09	0.0171154
Sham: Block 3 Slope Diff.	10150	-0.0326273	0.0185596	10140	0.02	0.009119	10140	** -0.05	0.0183279
Stim: Block 3 Slope Diff.	10140	-0.00	0.016378	10140	0.01	0.00804669	10140	-0.0169102	0.0161737
		Var	SD		Var	SD		Var	SD
Random
Intercept		1.53001	1.23693		0.332498	0.5766		1.12941	1.06274
Trial		0.0005526	0.02351		0.0002104	0.0145		0.0004785	0.02187
Residual		0.909876	0.95387		0.219623	0.4686		0.887373	0.942
N	21
Observations	10188
	Opt. 7: Left Dorsomedial PFC - B.A. 10
	HbO			HbR			Oxy
	df	B	SE	df	B	SE	df	B	SE
Fixed
Stim: Block 2 Intercept	20.47	-0.247246	0.409214	20.61	0.06	0.220883	21.18	-0.307048	0.372166
Sham: Block 1 Intercept Diff.	19.93	0.67	0.561615	20	0.16	0.302894	20.36	0.51	0.509137
Stim: Block 1 Intercept Diff.	9561	*** 0.71	0.073044	9549	* -0.10	0.0417854	9463	*** 0.82	0.0807202
Sham: Block 2 Intercept Diff.	20.53	-0.27565	0.565782	20.68	-0.536307	0.305419	21.26	0.26	0.514713
Sham: Block 3 Intercept Diff.	21.79	-0.337054	0.574329	22.11	* -0.78	0.31059	23.21	0.44	0.526088
Stim: Block 3 Intercept Diff.	9566	0.12	0.0765579	9556	*** 0.41	0.0437961	9483	** -0.28	0.0846093
Stim: Block 2 Slope	9555	-0.0160762	0.0124706	9555	-0.00	0.00713631	9556	-0.0118486	0.0138038
Sham: Block 1 Slope Diff.	9563	-0.0125851	0.0175645	9564	*** 0.04	0.0100509	9568	** -0.05	0.0194396
Stim: Block 1 Slope Diff.	9556	0.01	0.0166989	9557	0.00	0.0095559	9558	0.01	0.0184837
Sham: Block 2 Slope Diff.	9555	*** 0.07	0.0177471	9556	*** -0.07	0.0101558	9556	*** 0.13	0.0196443
Sham: Block 3 Slope Diff.	9557	-0.0280759	0.0190458	9558	* 0.03	0.0108988	9560	** -0.06	0.0210808
Stim: Block 3 Slope Diff.	9557	0.02	0.0173882	9558	0.01	0.00995032	9559	0.01	0.0192464
		Var	SD		Var	SD		Var	SD
Random
Intercept		1.6063	1.2674		0.465568	0.68233		1.30193	1.14102
Trial		0.00208	0.04561		0.0005828	0.02414		0.001392	0.03731
Residual		0.89131	0.94409		0.291879	0.54026		1.09211	1.04504
N	21
Observations	9606
	Opt. 8: Left Ventromedial PFC - B.A. 10
	HbO			HbR			Oxy
	df	B	SE	df	B	SE	df	B	SE
Fixed
Stim: Block 2 Intercept	19.16	-0.368687	0.436848	18.88	0.21	0.26496	18.94	-0.575722	0.409292
Sham: Block 1 Intercept Diff.	18.68	0.85	0.613898	18.51	-0.0180753	0.372855	18.47	0.87	0.57522
Stim: Block 1 Intercept Diff.	8637	*** 1.22	0.074003	8606	*** -0.18	0.0397879	8517	*** 1.39	0.069052
Sham: Block 2 Intercept Diff.	19.31	-0.210216	0.619024	19	-0.277379	0.375293	19.09	0.07	0.579957
Sham: Block 3 Intercept Diff.	20.65	-0.437183	0.629455	20.03	-0.565677	0.380264	20.39	0.13	0.589591
Stim: Block 3 Intercept Diff.	8632	-0.147995	0.0761971	8600	*** 0.26	0.0409663	8503	*** -0.40	0.0710958
Stim: Block 2 Slope	8639	-0.0126337	0.0122016	8638	0.01	0.00656409	8638	(*) -0.02	0.0114056
Sham: Block 1 Slope Diff.	8646	-0.0176677	0.0178114	8646	-0.00	0.00958237	8647	-0.016469	0.0166489
Stim: Block 1 Slope Diff.	8640	0.02	0.0166804	8640	-0.0163786	0.0089735	8640	(*) 0.03	0.0155919
Sham: Block 2 Slope Diff.	8639	*** 0.10	0.0193934	8639	-0.0140041	0.0104331	8638	*** 0.12	0.0181281
Sham: Block 3 Slope Diff.	8642	-0.0306967	0.0216152	8642	-0.0155676	0.0116281	8644	-0.0151163	0.0202037
Stim: Block 3 Slope Diff.	8641	0.01	0.0171593	8640	-0.0106844	0.00923118	8641	0.02	0.0160395
		Var	SD		Var	SD		Var	SD
Random
Intercept		1.83812	1.35577		0.681756	0.82568		1.61426	1.27053
Trial		0.001693	0.04114		0.0003904	0.01976		0.0008523	0.02919
Residual		0.894864	0.94597		0.258979	0.5089		0.78192	0.88426
N	20
Observations	8687
	Opt. 9: Right Dorsomedial PFC - B.A. 10
	HbO			HbR			Oxy
	df	B	SE	df	B	SE	df	B	SE
Fixed
Stim: Block 2 Intercept	20.32	-0.13858	0.446096	20.27	0.05	0.266239	20.75	-0.187526	0.435559
Sham: Block 1 Intercept Diff.	19.82	0.60	0.612586	19.8	0.26	0.365692	20.15	0.34	0.59742
Stim: Block 1 Intercept Diff.	9547	*** 0.46	0.0760367	9558	** -0.14	0.0444628	9417	*** 0.61	0.0810703
Sham: Block 2 Intercept Diff.	20.37	-0.0632626	0.616758	20.32	-0.454818	0.368084	20.81	0.39	0.602255
Sham: Block 3 Intercept Diff.	21.51	-0.0931611	0.625222	21.41	-0.770539	0.372939	22.21	0.68	0.612044
Stim: Block 3 Intercept Diff.	9554	-0.00669337	0.0796096	9563	*** 0.31	0.0465513	9443	*** -0.31	0.0848883
Stim: Block 2 Slope	9554	** -0.04	0.0129833	9554	** -0.02	0.00758989	9554	-0.0187082	0.0138674
Sham: Block 1 Slope Diff.	9562	-0.00566219	0.0181988	9561	*** 0.05	0.010639	9564	** -0.06	0.0194368
Stim: Block 1 Slope Diff.	9556	** 0.05	0.0174099	9555	** 0.03	0.0101777	9556	0.02	0.0185952
Sham: Block 2 Slope Diff.	9555	*** 0.12	0.0185026	9555	*** -0.04	0.0108164	9555	*** 0.16	0.0197625
Sham: Block 3 Slope Diff.	9557	-0.0103442	0.0198908	9557	*** 0.04	0.011628	9559	** -0.05	0.0212443
Stim: Block 3 Slope Diff.	9556	** 0.049	0.0181131	9556	** 0.03	0.0105888	9557	0.02	0.0193462
		Var	SD		Var	SD		Var	SD
Random
Intercept		1.91605	1.38421		0.683525	0.82676		1.81327	1.34658
Trial		0.00192	0.04382		0.0007458	0.02731		0.001242	0.03524
Residual		0.96772	0.98373		0.330711	0.57507		1.10402	1.05072
N	21
Observations	9605
	Opt. 10: Right Ventromedial PFC - B.A. 10
	HbO			HbR			Oxy
	df	B	SE	df	B	SE	df	B	SE
Fixed
Stim: Block 2 Intercept	20.43	-0.149812	0.419123	21.95	0.36	0.210586	20.64	-0.500738	0.392865
Sham: Block 1 Intercept Diff.	19.92	0.64	0.5755	20.83	-0.228383	0.287187	20.06	0.87	0.538995
Stim: Block 1 Intercept Diff.	9730	*** 0.81	0.0741167	9314	** -0.16	0.0539644	9326	*** 0.97	0.0742626
Sham: Block 2 Intercept Diff.	20.57	-0.200041	0.580126	22.27	* -0.81	0.292022	20.8	0.62	0.543894
Sham: Block 3 Intercept Diff.	21.96	-0.266076	0.589662	25.42	** -1.01	0.301859	22.39	0.76	0.553978
Stim: Block 3 Intercept Diff.	9742	*** -0.36	0.0778209	9387	** 0.19	0.0566723	9397	*** -0.56	0.0779917
Stim: Block 2 Slope	9760	-0.0201709	0.0124618	9760	-0.00729904	0.00910541	9760	-0.0128712	0.0125289
Sham: Block 1 Slope Diff.	9770	-0.0283729	0.018073	9779	0.01	0.0132004	9774	(*) -0.04	0.0181685
Stim: Block 1 Slope Diff.	9762	0.02	0.0168341	9764	0.01	0.0122994	9763	0.02	0.0169242
Sham: Block 2 Slope Diff.	9761	*** 0.09	0.0182815	9762	-0.0115968	0.0133573	9761	*** 0.10	0.0183798
Sham: Block 3 Slope Diff.	9764	-0.0187708	0.0199876	9769	-0.00	0.0146023	9767	-0.0168907	0.0200931
Stim: Block 3 Slope Diff.	9762	0.02	0.017593	9766	0.02	0.0128535	9764	-0.00	0.017687
		Var	SD		Var	SD		Var	SD
Random
Intercept		1.68652	1.29866		0.406506	0.63758		1.47342	1.21385
Trial		0.00163	0.04038		0.000376	0.01939		0.000726	0.02694
Residual		0.9859	0.99292		0.526381	0.72552		0.996563	0.99828
N	21
Observations	9811
	Opt. 11: Right Dorsomedial PFC - B.A. 10
	HbO			HbR			Oxy
	df	B	SE	df	B	SE	df	B	SE
Fixed
Stim: Block 2 Intercept	18.01	-0.138902	0.395805	18.77	0.19	0.117368	18.98	-0.323074	0.421417
Sham: Block 1 Intercept Diff.	17.69	0.17	0.54315	18.14	-0.123112	0.160399	18.6	0.30	0.578033
Stim: Block 1 Intercept Diff.	7748	** 0.17	0.0642505	8535	*** -0.27	0.026179	7937	*** 0.44	0.0717094
Sham: Block 2 Intercept Diff.	18.2	0.82	0.546981	19.14	(*) -0.37	0.162584	19.21	1.18	0.582531
Sham: Block 3 Intercept Diff.	19.33	0.36	0.555305	21.45	*** -0.62	0.167274	20.57	0.97	0.59229
Stim: Block 3 Intercept Diff.	8088	*** -0.51	0.0665569	8655	*** 0.18	0.0271001	8228	*** -0.69	0.0742733
Stim: Block 2 Slope	8857	0.00	0.0105078	8856	(*) -0.01	0.00426322	8857	0.01	0.0117177
Sham: Block 1 Slope Diff.	8869	-0.0186551	0.0159112	8871	** 0.02	0.00645461	8869	(*) -0.04	0.0177432
Stim: Block 1 Slope Diff.	8865	-0.00635333	0.0147785	8864	(*) 0.01	0.00599604	8864	-0.0182779	0.0164803
Sham: Block 2 Slope Diff.	8858	* 0.04	0.0157965	8857	-0.0122959	0.00640888	8858	** 0.05	0.0176154
Sham: Block 3 Slope Diff.	8864	-0.0264454	0.017324	8861	* 0.02	0.00702921	8863	* -0.04	0.0193191
Stim: Block 3 Slope Diff.	8859	-0.00572973	0.0152089	8859	* 0.01	0.00617051	8859	-0.0190328	0.0169601
		Var	SD		Var	SD		Var	SD
Random
Intercept		1.36329	1.1676		0.116174	0.340843		1.54012	1.24102
Trial		0.0003179	0.01783		9.32e-05	0.009654		0.0004335	0.02082
Residual		0.718321	0.84754		0.118242	0.343863		0.893266	0.94513
N	19
Observations	8903
	Opt. 12: Right Ventromedial PFC - B.A. 10
	HbO			HbR			Oxy
	df	B	SE	df	B	SE	df	B	SE
Fixed
Stim: Block 2 Intercept	19.15	0.10	0.384096	19.14	0.24	0.191407	20.2	-0.136942	0.321793
Sham: Block 1 Intercept Diff.	18.78	0.10	0.515401	18.76	-0.239925	0.2568	19.58	0.34	0.430606
Stim: Block 1 Intercept Diff.	9517	0.12	0.0634698	9775	*** -0.31	0.0320769	9116	*** 0.43	0.0666974
Sham: Block 2 Intercept Diff.	19.31	-0.0999443	0.518944	19.3	-0.275483	0.258627	20.45	0.17	0.435246
Sham: Block 3 Intercept Diff.	20.38	-0.288536	0.526033	20.42	-0.261568	0.262284	22.26	-0.0323091	0.444475
Stim: Block 3 Intercept Diff.	9580	** -0.23	0.0657874	9804	** 0.10	0.0332442	9228	*** -0.32	0.0691409
Stim: Block 2 Slope	9923	-0.00711159	0.0102717	9923	* -0.01	0.00518168	9924	0.01	0.0108161
Sham: Block 1 Slope Diff.	9935	(*) -0.03	0.0149644	9934	0.01	0.00754917	9940	* -0.04	0.0157546
Stim: Block 1 Slope Diff.	9927	0.01	0.0145288	9926	* 0.02	0.00732938	9929	-0.00659212	0.015298
Sham: Block 2 Slope Diff.	9924	*** 0.05	0.015131	9924	0	0.00763301	9925	** 0.06	0.0159327
Sham: Block 3 Slope Diff.	9930	-0.00	0.0160602	9928	** 0.02	0.00810218	9932	-0.0238788	0.0169102
Stim: Block 3 Slope Diff.	9927	-0.00	0.014962	9926	** 0.02	0.00754794	9929	-0.0213783	0.0157542
		Var	SD		Var	SD		Var	SD
Random
Intercept		1.2826	1.13252		0.318161	0.5641		0.882256	0.93928
Trial		0.0005092	0.02256		0.0001905	0.0138		0.0004148	0.02037
Residual		0.716393	0.8464		0.182309	0.427		0.794365	0.89127
N	20
Observations	9972
	Opt. 13: Right Dorsolareral PFC - B.A. 46
	HbO			HbR			Oxy
	df	B	SE	df	B	SE	df	B	SE
Fixed
Stim: Block 2 Intercept	20.78	-0.170305	0.298783	20.5	0.28	0.153445	21.39	-0.448151	0.288289
Sham: Block 1 Intercept Diff.	20.13	-0.0884494	0.409574	19.92	-0.388146	0.210498	20.5	0.30	0.394109
Stim: Block 1 Intercept Diff.	9874	*** 0.26	0.0595114	10360	*** -0.42	0.0290212	10240	*** 0.68	0.0663531
Sham: Block 2 Intercept Diff.	20.92	0.41	0.413505	20.62	-0.239658	0.212333	21.58	0.65	0.39921
Sham: Block 3 Intercept Diff.	22.57	0.64	0.421445	22.11	-0.26633	0.216047	23.88	(*) 0.90	0.409465
Stim: Block 3 Intercept Diff.	9961	*** -0.34	0.0618329	10390	*** 0.31	0.0301485	10280	*** -0.65	0.0689328
Stim: Block 2 Slope	10550	-0.00	0.00986578	10550	* -0.01	0.00479763	10550	0.01	0.0109786
Sham: Block 1 Slope Diff.	10560	** -0.04	0.0142759	10560	** 0.02	0.00694279	10560	*** -0.06	0.015885
Stim: Block 1 Slope Diff.	10550	0.00	0.0135764	10550	** 0.02	0.00660227	10550	-0.0179585	0.0151079
Sham: Block 2 Slope Diff.	10550	*** 0.07	0.0143666	10550	* -0.02	0.00698633	10550	*** 0.09	0.015987
Sham: Block 3 Slope Diff.	10550	(*) -0.03	0.0153331	10550	** 0.02	0.00745689	10550	** -0.06	0.0170633
Stim: Block 3 Slope Diff.	10550	0	0.0140048	10550	* 0.02	0.00681063	10550	-0.0204704	0.0155846
		Var	SD		Var	SD		Var	SD
Random
Intercept		0.848373	0.92107		0.224859	0.47419		0.775802	0.8808
Trial		0.0004054	0.02013		0.0001628	0.01276		0.0007027	0.02651
Residual		0.668864	0.81784		0.15817	0.39771		0.828285	0.9101
N	21
Observations	10596
	Opt. 14: Right Ventrolateral PFC - B.A. 46
	HbO			HbR			Oxy
	df	B	SE	df	B	SE	df	B	SE
Fixed
Stim: Block 2 Intercept	26.91	-0.0799587	0.258374	20.81	0.17	0.174657	22.29	-0.249281	0.242823
Sham: Block 1 Intercept Diff.	25.61	0.02	0.353138	20.17	-0.229402	0.239428	21.08	0.24	0.330866
Stim: Block 1 Intercept Diff.	9410	*** 0.40	0.0604205	10260	*** -0.36	0.0346582	9723	*** 0.76	0.064097
Sham: Block 2 Intercept Diff.	27.25	-0.101337	0.357971	20.98	0.09	0.241811	22.6	-0.201881	0.336685
Sham: Block 3 Intercept Diff.	30.7	-0.307689	0.367492	22.67	0.10	0.246532	25.82	-0.411134	0.348086
Stim: Block 3 Intercept Diff.	9529	-0.0683903	0.062715	10290	*** 0.43	0.0359667	9813	*** -0.49	0.0665253
Stim: Block 2 Slope	10470	-0.0102464	0.0100424	10470	** -0.02	0.00573625	10470	0.01	0.0106395
Sham: Block 1 Slope Diff.	10490	* -0.04	0.0145777	10490	0.01	0.00832856	10490	** -0.05	0.0154428
Stim: Block 1 Slope Diff.	10480	0.01	0.013803	10480	** 0.02	0.00788479	10480	-0.0100825	0.0146237
Sham: Block 2 Slope Diff.	10470	*** 0.06	0.014683	10470	0.01	0.00838708	10480	** 0.05	0.0155559
Sham: Block 3 Slope Diff.	10480	-0.00853811	0.0157728	10480	** 0.03	0.00901064	10480	* -0.04	0.0167111
Stim: Block 3 Slope Diff.	10480	0.01	0.014218	10480	*** 0.03	0.00812193	10480	-0.0246015	0.0150634
		Var	SD		Var	SD		Var	SD
Random
Intercept		0.621962	0.78865		0.289937	0.53846		0.538187	0.73361
Trial		0.0003343	0.01828		0.0002164	0.01471		0.0004446	0.02109
Residual		0.692703	0.83229		0.226003	0.4754		0.777545	0.88179
N	21
Observations	10523
	Opt. 15: Right Pars Opercularis - B.A. 44
	HbO			HbR			Oxy
	df	B	SE	df	B	SE	df	B	SE
Fixed
Stim: Block 2 Intercept	24.39	-0.0637746	0.257727	20.76	0.03	0.200424	25.1	-0.0965895	0.308682
Sham: Block 1 Intercept Diff.	23.27	-0.187645	0.35221	20.09	0.12	0.274664	23.91	-0.306333	0.421842
Stim: Block 1 Intercept Diff.	9418	-0.0359455	0.0603588	10420	*** -0.26	0.0403296	9912	** 0.22	0.0721206
Sham: Block 2 Intercept Diff.	24.63	-0.0470423	0.356888	20.9	-0.232493	0.277394	25.34	0.19	0.427457
Sham: Block 3 Intercept Diff.	27.53	-0.0953431	0.366287	22.61	-0.487664	0.282906	28.4	0.39	0.438738
Stim: Block 3 Intercept Diff.	9580	(*) -0.13	0.062674	10450	*** 0.56	0.0418606	10010	*** -0.70	0.0748754
Stim: Block 2 Slope	10510	-0.0176256	0.0100201	10510	-0.00940896	0.00665853	10510	-0.00820032	0.011947
Sham: Block 1 Slope Diff.	10530	-0.0179679	0.0145336	10520	** 0.03	0.00965998	10530	** -0.05	0.0173293
Stim: Block 1 Slope Diff.	10520	0.03	0.0137788	10510	0.01	0.00915688	10520	0.02	0.0164289
Sham: Block 2 Slope Diff.	10510	*** 0.06	0.0145507	10510	** -0.03	0.00966935	10510	*** 0.09	0.017349
Sham: Block 3 Slope Diff.	10520	-0.0135828	0.015527	10520	* 0.03	0.0103195	10520	* -0.04	0.018514
Stim: Block 3 Slope Diff.	10520	0.01	0.0142632	10510	0.01	0.00947895	10520	-0.00	0.0170067
		Var	SD		Var	SD		Var	SD
Random
Intercept		0.618617	0.7865		0.381148	0.61737		0.887491	0.94207
Trial		0.0003311	0.0182		0.0003975	0.01994		0.0006279	0.02506
Residual		0.686546	0.8286		0.303159	0.5506		0.975997	0.98793
N	21
Observations	10562
	Opt. 16: Right Pars Triangularis - B.A. 45
	HbO			HbR			Oxy
	df	B	SE	df	B	SE	df	B	SE
Fixed
Stim: Block 2 Intercept	20.95	-0.172385	0.340282	20.28	0.27	0.19503	20.8	-0.439643	0.364618
Sham: Block 1 Intercept Diff.	20.24	-0.255402	0.466141	19.79	-0.44262	0.26785	20.16	0.19	0.49992
Stim: Block 1 Intercept Diff.	8435	* 0.18	0.0712696	10180	*** -0.44	0.033956	9298	*** 0.62	0.0720733
Sham: Block 2 Intercept Diff.	21.12	0.58	0.471146	20.4	0.06	0.269881	20.96	0.53	0.504747
Sham: Block 3 Intercept Diff.	22.96	(*) 1.02	0.481091	21.65	0.30	0.273933	22.6	0.74	0.514352
Stim: Block 3 Intercept Diff.	8612	*** -0.52	0.0739498	10210	*** 0.13	0.0352201	9413	*** -0.65	0.074772
Stim: Block 2 Slope	10420	-0.00922175	0.0118783	10420	-0.0062819	0.00561691	10420	-0.00	0.0119738
Sham: Block 1 Slope Diff.	10430	** -0.06	0.0172079	10430	-0.00	0.00813921	10430	** -0.05	0.0173481
Stim: Block 1 Slope Diff.	10420	0.01	0.0163306	10420	0.01	0.00772299	10420	0.01	0.0164626
Sham: Block 2 Slope Diff.	10420	*** 0.11	0.0173299	10420	0.01	0.00819496	10420	*** 0.10	0.0174694
Sham: Block 3 Slope Diff.	10430	-0.0263309	0.01875	10420	0.02	0.00886829	10430	* -0.04	0.0189025
Stim: Block 3 Slope Diff.	10420	-0.00	0.0167931	10420	0.01	0.00794177	10420	-0.0131724	0.0169288
		Var	SD		Var	SD		Var	SD
Random
Intercept		1.09507	1.04645		0.365921	0.60491		1.26484	1.12465
Trial		0.0003281	0.01811		0.0001981	0.01408		0.0004583	0.02141
Residual		0.963207	0.98143		0.215374	0.46408		0.978752	0.98932
N	21
Observations	10466
Notes * p<.05 ** p<.01 *** p<.001 () removed in multiple comparisons test
